# Supplementary material
Source: publisher figshare collection journal article supplement (https://asha.figshare.com/articles/dataset/_/8233391)
Supplement: Supplementary file 1 [file 1]

**Supplemental Material S5.** Initial codebook.

Codes and abridged codebook definitions used to analyze interview data and assign meaning units together into themes and subthemes.

| <b>Descriptive code</b>                           | <b>Brief definition</b>                                                                                                       | <b>Subtheme</b> |
|---------------------------------------------------|-------------------------------------------------------------------------------------------------------------------------------|-----------------|
| Emotional reaction to the dual task <sup>*</sup>  | Comments about the speaker’s emotional response to the dual task                                                              | I.A             |
| Dual task distraction                             | Comments about dividing their attention between the story retell and tone discrimination tasks                                | I.B             |
| Behavioral reaction to the dual task <sup>*</sup> | Comments about how the concurrent task influenced the speakers’ performance and behavior when retelling the story             | I.C             |
| Story Topic                                       | Comments about what topics or stories they preferred and how the story topic influenced their retell                          | Removed         |
| Detail                                            | Any mention of specific story details and how they dealt with them                                                            | Removed         |
| General attention                                 | Comments related to the speaker’s general focus or concentration (i.e., not related to a specific task during the experiment) | Removed         |
| Task prioritization                               | comments that indicate that they consciously chose to focus on one task over another                                          | II.A            |
| Time awareness                                    | Specific mention of the role of time in their performance of the task                                                         | Removed         |
| Dual task assessment <sup>**</sup>                | Speaker’s own judgement about how they did at retelling the story with the dual task                                          | I.D             |
| Intentional strategies <sup>*</sup>               | Mention of specific strategies that they used when retelling the story                                                        | II.B            |

*Note.* <sup>\*</sup> A code that was subcoded for descriptive purposes and to aid analysis. <sup>\*\*</sup> Codes that were subcoded according to valence: positive, negative, or mixed. Subcode information was used in assigning themes and determining categories within themes as shown in Table 6. *Removed* indicates that the code was not included in the final organization because it was not directly relevant to the questions of the present analysis.
