# Supplementary material
Source: publisher figshare collection journal article supplement (https://asha.figshare.com/articles/dataset/_/8233391)
Supplement: Supplementary file 2 [file 1]

### **Supplemental Material S4. Interview guide.**

1. Let's start the discussion by talking about your overall experience during the experiment.
  - a. What was easy for you?
  - b. What was difficult for you?
  
2. Now, let's talk about each specific situation.
  - a. How do you think you did at telling the story when you did not have to listen for tones? What were your thoughts and feelings when retelling this story? What strategies, if any, were helpful?
  - b. How do you think you did at telling the story when you had to also listen for tones? What were your thoughts and feelings when retelling this story? What strategies, if any, were helpful?
