# Supplementary material
Source: publisher figshare collection journal article supplement (https://asha.figshare.com/articles/dataset/_/8233391)
Supplement: Supplementary file 3 [file 1]

**Supplemental Material S1.** Intrarater and interrater reliability for spoken language codes.

|                | <b>Word count</b> | <b>Utterance count</b> | <b>CIUs</b> | <b>Repetitions</b> | <b>Pauses</b> |
|----------------|-------------------|------------------------|-------------|--------------------|---------------|
| TH intrarater  | —                 | —                      | —           | .94                | .98           |
| RA1 intrarater | .99               | .91                    | .99         | —                  | —             |
| RA2 intrarater | —                 | —                      | —           | .87                | .98           |
| Interrater     | .99               | .80                    | .99         | .83                | .94           |

*Note.* Intrarater and interrater reliability were measured using Pearson's correlations. All intrarater reliability measures were obtained by having the primary coder(s) recode a random selection of 20% of the samples. Interrater reliability was also based on a random selection of 20% of the samples. CIUs = correct information units; TH = first author; RA1 = undergraduate student research assistant; RA2 = graduate student research assistant.
