# Supplementary material
Source: publisher figshare collection journal article supplement (https://asha.figshare.com/articles/dataset/_/8233391)
Supplement: Supplementary file 4 [file 1]

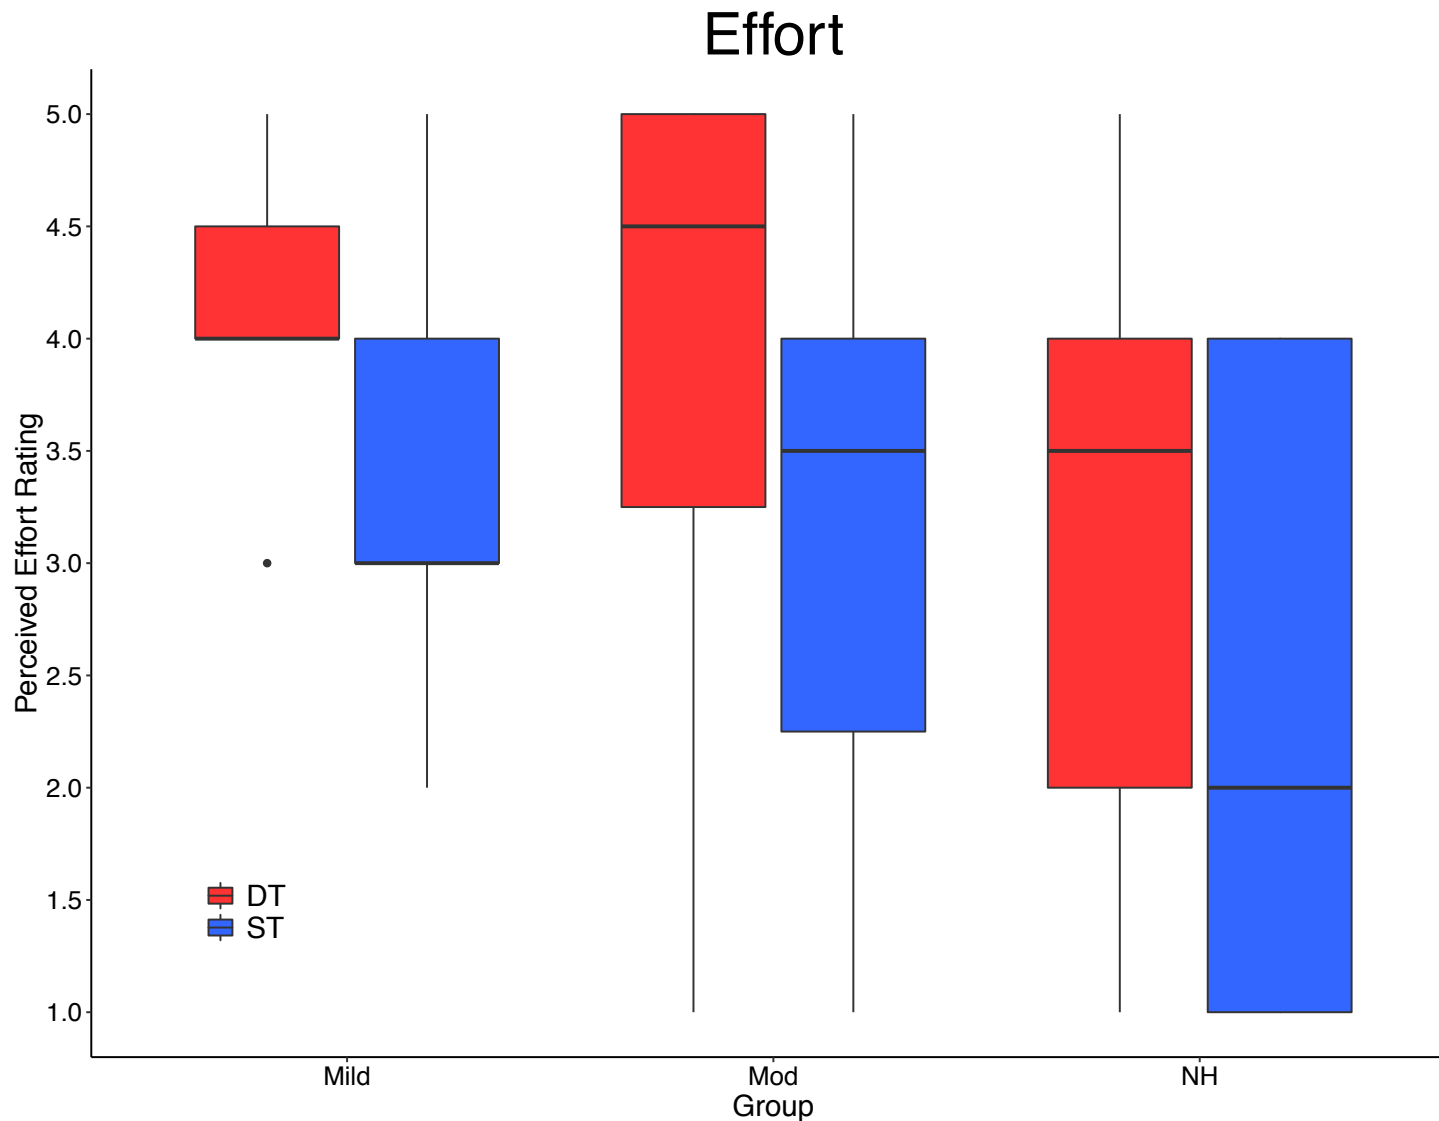

**Supplemental Material S2.** Perceived effort ratings among participants with mild, moderate, or no aphasia in single-task and dual-task conditions. ST = single task condition; DT = dual task condition. Boxes show interquartile range and whiskers extend to the upper and lower quartiles.
