# Supplementary material
Source: publisher figshare collection journal article supplement (https://asha.figshare.com/articles/dataset/_/8233391)
Supplement: Supplementary file 5 [file 1]

**Supplemental Material S3.** Correlations between assessment scores and story retell accuracy and speed.

|                           | <b>Productivity</b> | <b>Efficiency</b> | <b>Rate</b> | <b>Repetitions</b> | <b>Pauses</b> |
|---------------------------|---------------------|-------------------|-------------|--------------------|---------------|
| CCRSA                     | .104                | .155              | .046        | .173               | .062          |
| Synonym triplet judgments | .590***             | .443**            | .265        | .230               | .199          |
| Rhyming triplet judgments | .517***             | .424**            | .256        | .235               | .297          |
| TONI-IV                   | .201                | .209              | -.041       | -.040              | -.089         |

*Note.* CCRSA = Communication Confidence Rating Scale; TONI-IV = Test of Nonverbal Intelligence–Fourth Edition. Synonym triplet and rhyming triplet judgments are subtest of the Temple Assessment of Language and Short-Term memory in Aphasia (TALSA).

\*\* $p < .01$ . \*\*\* $p < .001$ .
